# Supplementary material for: MACROD2 Haploinsufficiency Impairs Catalytic Activity of PARP1 and Promotes Chromosome Instability and Growth of Intestinal Tumors
Source: Oxford University Press journal article supplement (doi:10.1158/2159-8290.cd-17-0909), 2018-06-07
Supplement: 21598290cd170909-sup-187672_3_supp_4795108_p9mj3m.docx [file 21598290cd170909-sup-187672_3_supp_4795108_p9mj3m.docx]

**SUPPLEMENTARY FIGURES**

**
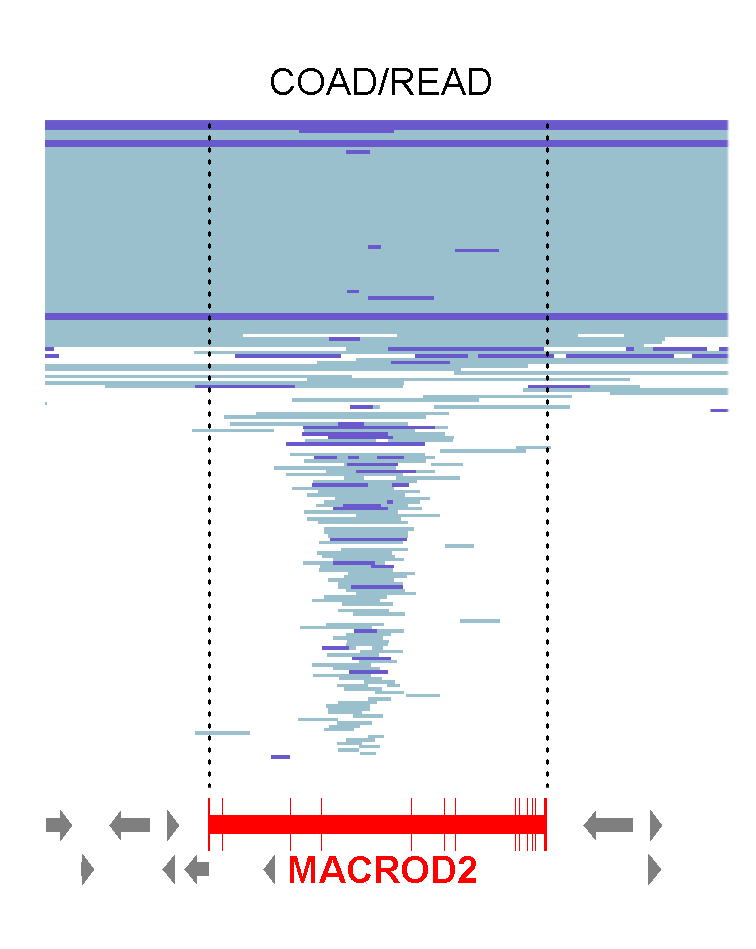
**

**Figure S1.** Fine map of deletions at the *MACROD2* locus in 616 TCGA-analyzed CRC cancers (COAD/READ). SNP array segmentation map showing the area surrounding *MACROD2* on chromosome 20. Cases are sorted by region of loss at the *MACROD2* locus; heterozygous (light blue bars) and homozygous (dark blue bars) deletions are labelled. Position and exons of the MACROD2 gene are indicated (red bars). Surrounding genes are indicated with grey arrows.


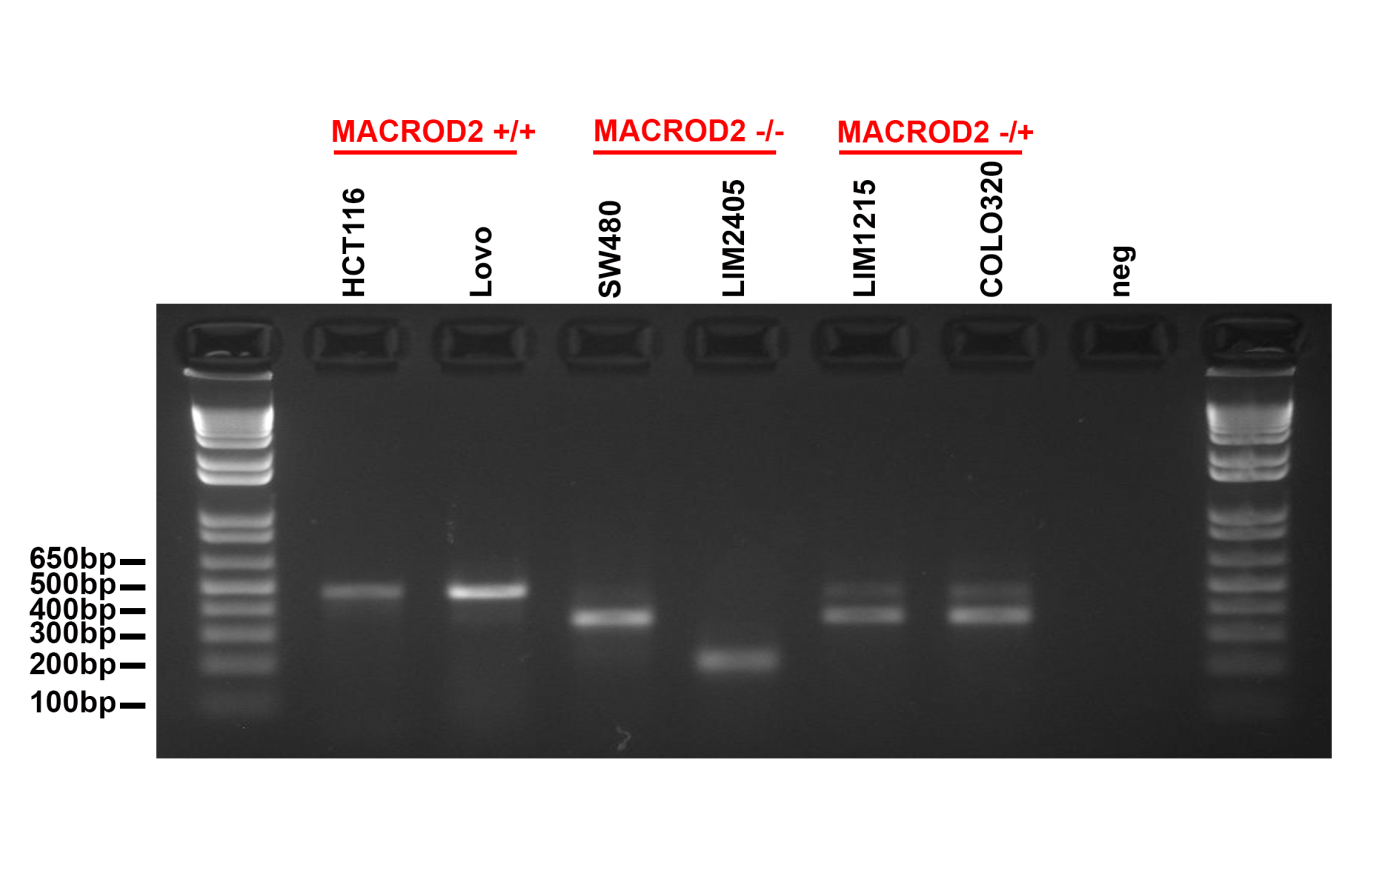


**Figure S2.** Representative gel image of *MACROD2* mRNA transcripts detected in *MACROD2* wild-type (LOVO, HCT116), heterozygous deleted (LIM1215, COLO320) and homozygous deleted (SW480, LIM2405) CRC cells. Wild-type fragment (exon 3-9) = 491bp.


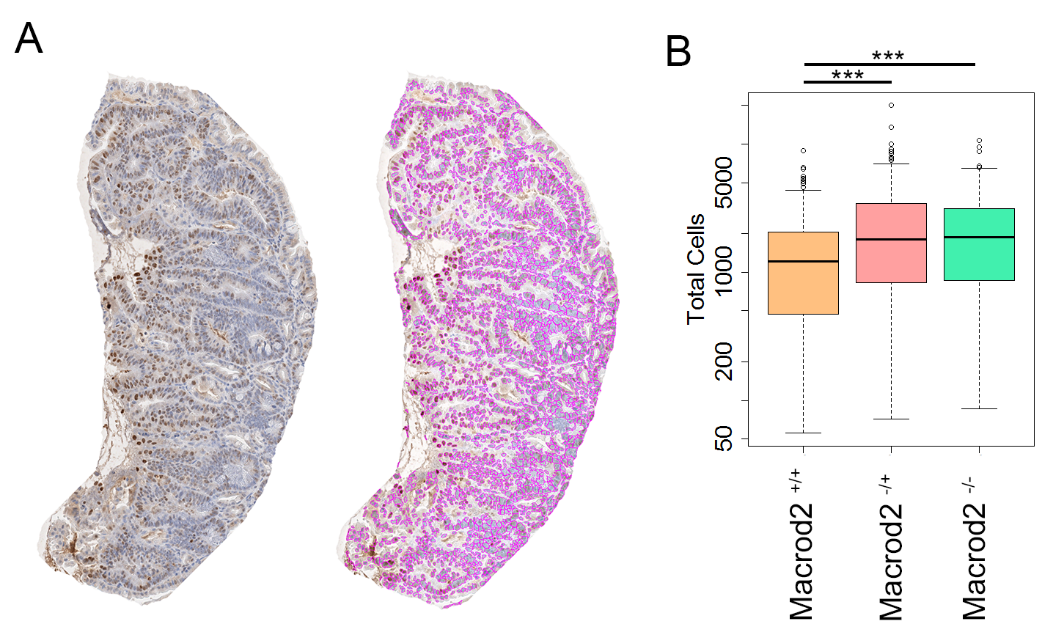


**Figure S3.** *MACROD2* deficiency enhances intestinal tumorigenesis in *ApcMin/+* mice (A) Representative adenoma section from the small intestine of an *ApcMin/+/Macrod2-/-* mouse stained with hematoxylin and eosin, and detection of neoplastic cells using image analysis. (B) Quantification of the number of neoplastic cells per adenoma, shown as boxplots. *** p<0.001 (Student’s t test).


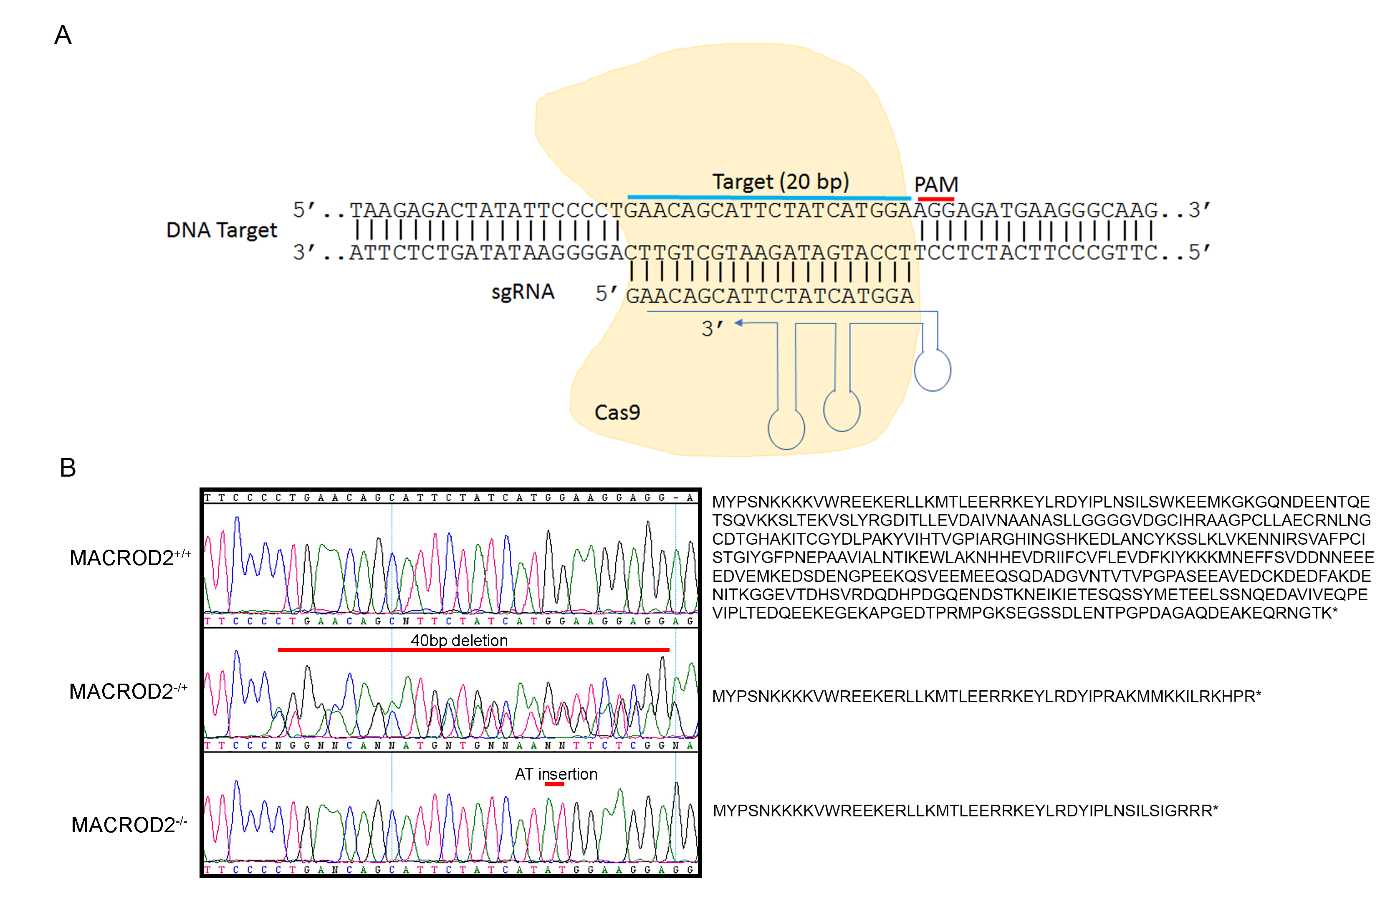


**Figure S4.** Generation of isogenic HCT116-*MACROD2-/-*, HCT116-*MACROD2-/+* and HCT116-*MACROD2+/+* cells using CRISPR/Cas9 technology. (**A**) Schematic diagram showing the strategy to disrupt the human *MACROD2* gene via CRISPR/Cas9 targeting of exon 2. (**B**) Sequencing chromatograms for wild-type, heterozygous and homozygous *MACROD2* knock-out clones and predicted protein sequences.


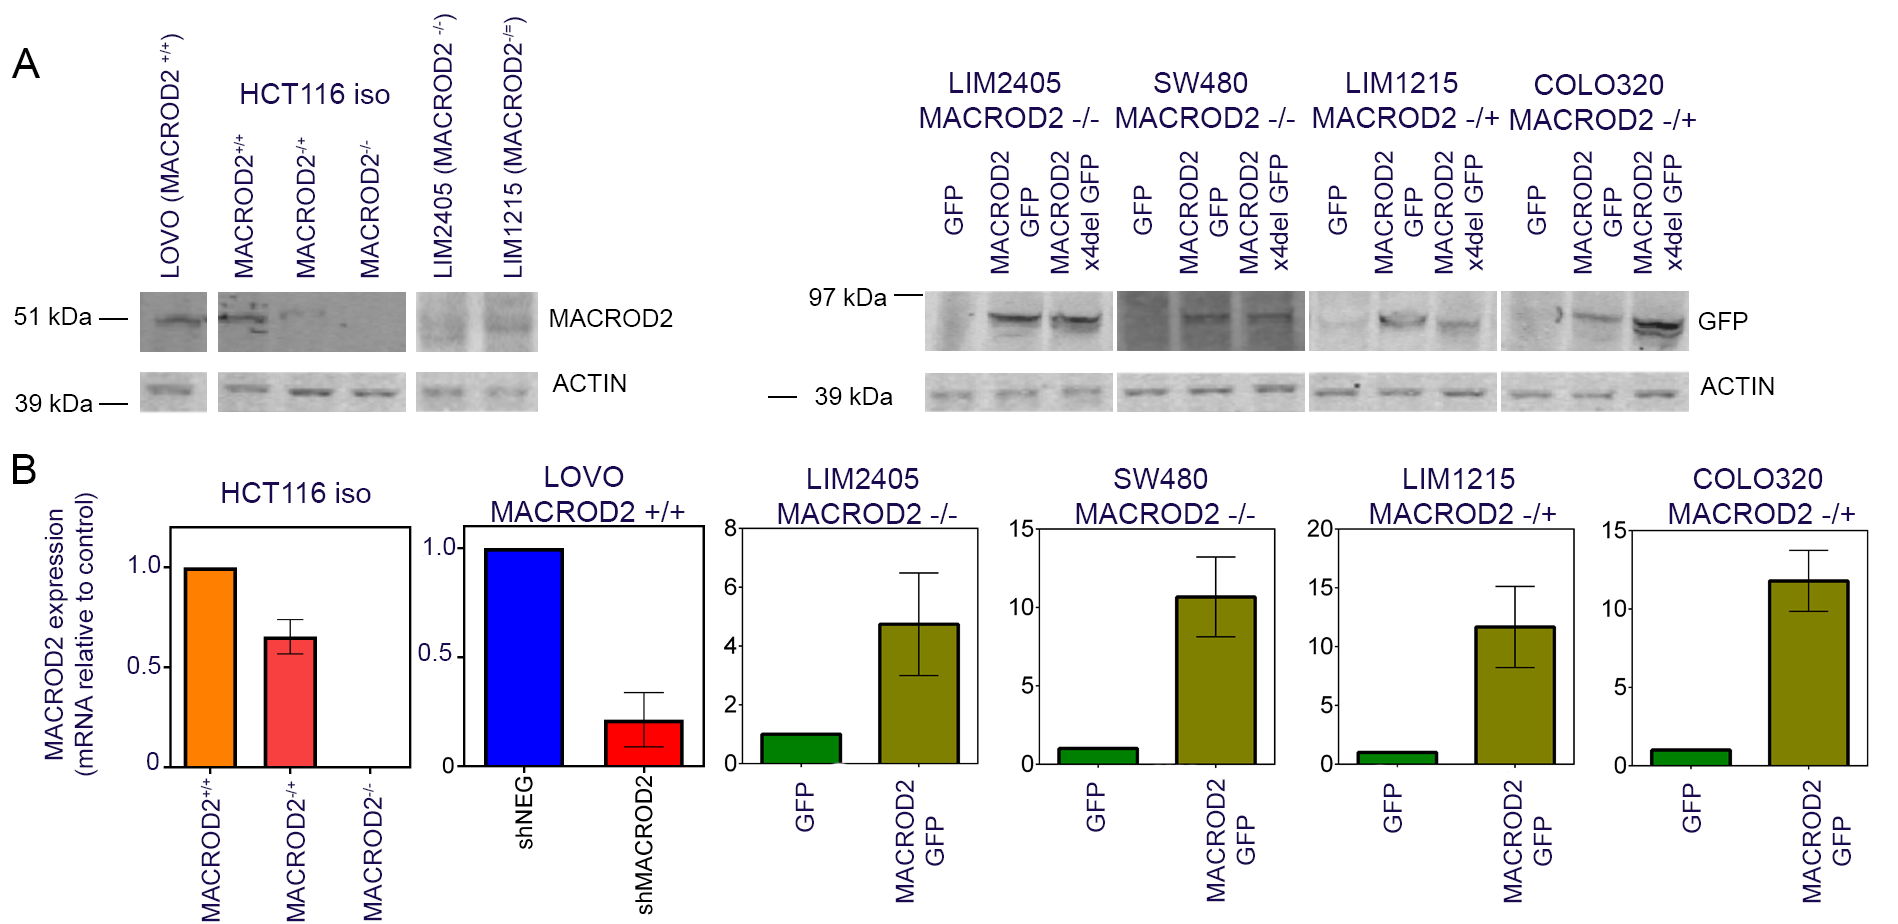


**Figure S5**. Expression levels of MACROD2 at endogenous levels and for GFP-tagged rescue constructs in isogenic *MACROD2* knock-out (HCT116) and *MACROD2* homozygous (LIM2405, SW480) and heterozygous (LIM1215, COLO320) deleted cell lines. (**A**) MACROD2 protein levels detected by western blot with anti-MACROD2 antibody (endogenous proteins) or anti-GFP antibody (overexpressed proteins). Actin was used as loading control. Endogenous MACROD2 = 52kDa, MACROD2 GFP = 79 kDa, MACROD2 x4del GFP = 78 kDa. (**B**) MACROD2 transcript levels detected using qRT-PCR relative to HMBS transcript levels and normalized to control for the indicated cell lines.

**
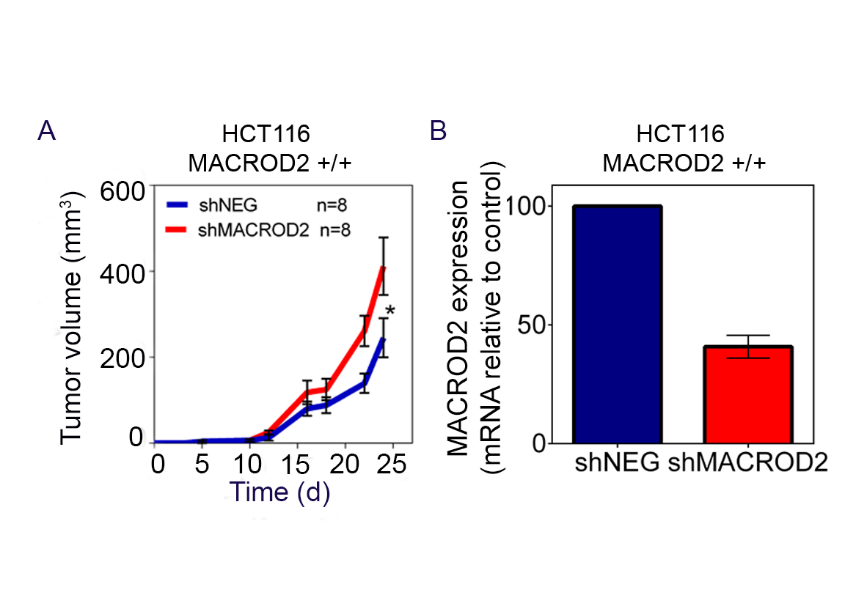
**

**Figure S6.** *MACROD2* deficiency enhances tumor xenograft growth of human CRC cell lines. (**A**) Human tumor xenograft establishment rate and growth in CBA athymic nude mice injected subcutaneously with HCT116-*MACROD2+/+* cells stably transfected with shRNA-*MACROD2* or shRNA-control. Data are means ± SEM of 12 tumors per condition representative of duplicate experiments. **p*<0.05 (Compare Groups of Growth Curves test). (**B**) Quantification of *MACROD2* mRNA expression levels relative to HMBS and normalized to control in HCT116 knock-down and control cells detected using qRT-PCR prior to injection.


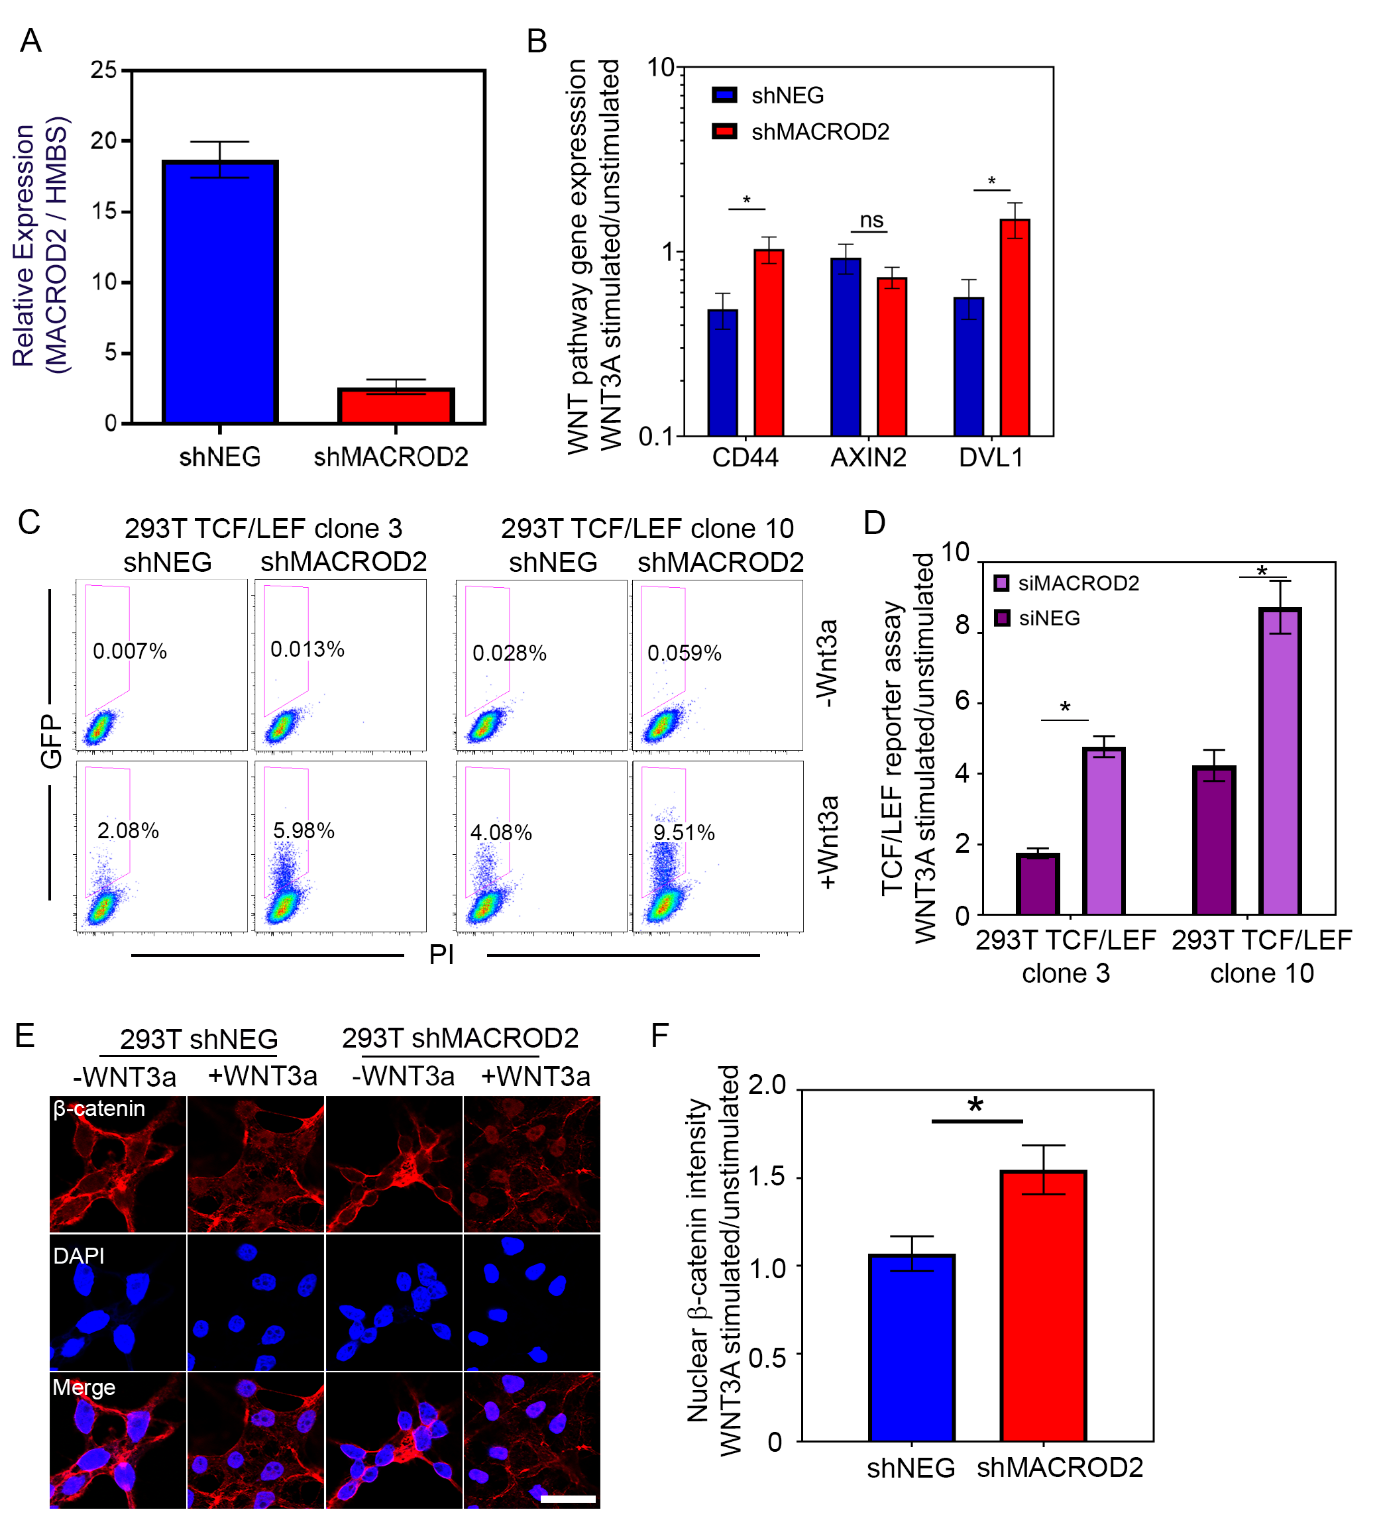


**Figure S7.** MACROD2 deficiency affects WNT signaling in *APC* and β-catenin wild-type HEK293T cells. (**A**) Quantification of *MACROD2* mRNA expression levels relative to HMBS in HEK293T knock-down and control cells using qRT-PCR. (**B**) Induction of WNT target gene expressionin response to stimulation with WNT3A for 24 hours. Data are means ± SEM for 6 replicates representative of duplicate experiments. ns, not significant, *p<0.05 (Student’s t test) (**C**) Representative flow cytometry plots of TCF/LEF reporter activity for two stable HEK293T clones transfected with siRNA-MACROD2 or siRNA-Control in response to WNT3A stimulation for 48 hours. 20,000 events were acquired. (**D**) Quantification of TCF/LEF reporter activity in response to WNT3A stimulation for 48 hours. Data are means ± SEM for 6 replicates representative of duplicate experiments * p<0.05 (Student’s t-test). (**E**) Representative immunofluorescence images of β-catenin re-localization in HEK293T knock-down and control cells in response to WNT3A stimulation for 16 hours. β-catenin (red), DAPI (blue) (scale bar, 20 µm). (**F**) Quantification of nuclear β-catenin re-localization after WNT3A stimulation for 16 hours.Data are means ± SEM of >100 cells representative of duplicate experiments. * p<0.05 (Student’s t-test).

**
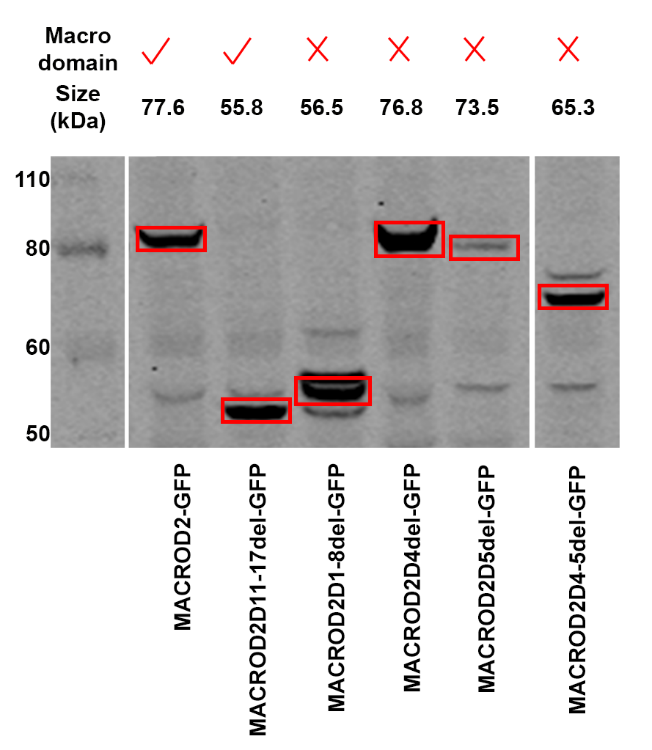
**

**Figure S8.** *MACROD2* deletion transcripts cloned from CRC cell lines and expressed in HeLa cells. Western blot for GFP-tagged full-length MACROD2, MACROD2Δex1-8, MACROD2Δex4, MACROD2Δex5 and MACROD2Δex4-5 proteins. Presence and absence of the MACROD2 macrodomain and expected protein sizes are indicated.

**
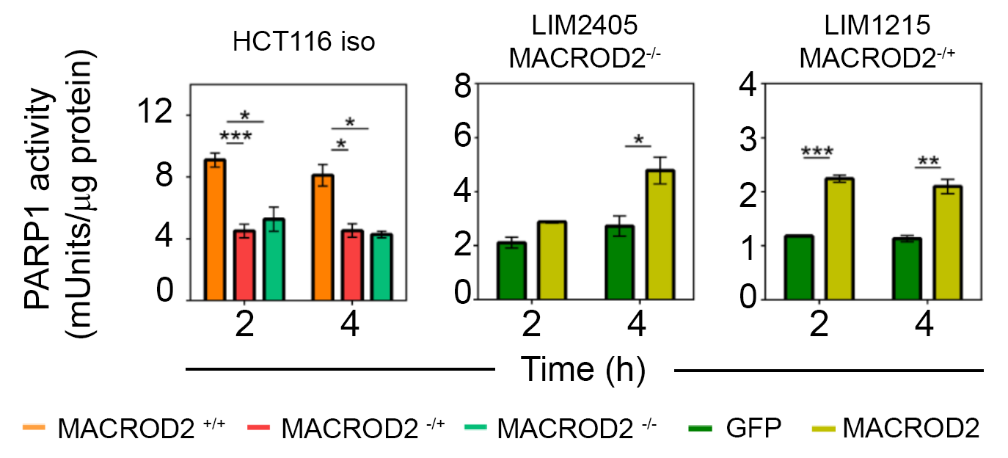
**

**Figure S9**. MACROD2 macrodomain deletion causes repression of PARP1 transferase activity. Incorporation of biotinylated PAR onto histone proteins for isogenic HCT116-*MACROD2-/-*, HCT116-*MACROD2-/+* and HCT116-*MACROD2+/+*cells or LIM2405-*MACROD2-/-* and LIM1215-*MACROD2-/+* cells reconstituted with wild-type *MACROD2* or GFP control challenged with γ-irradiation (IR, 10 Gy). Data is presented as the mean ± SEM of 6 repeats representative of duplicate experiments. **p*<0.05, ***p*<0.01, ****p*<0.001 (Student’s t-test).

**
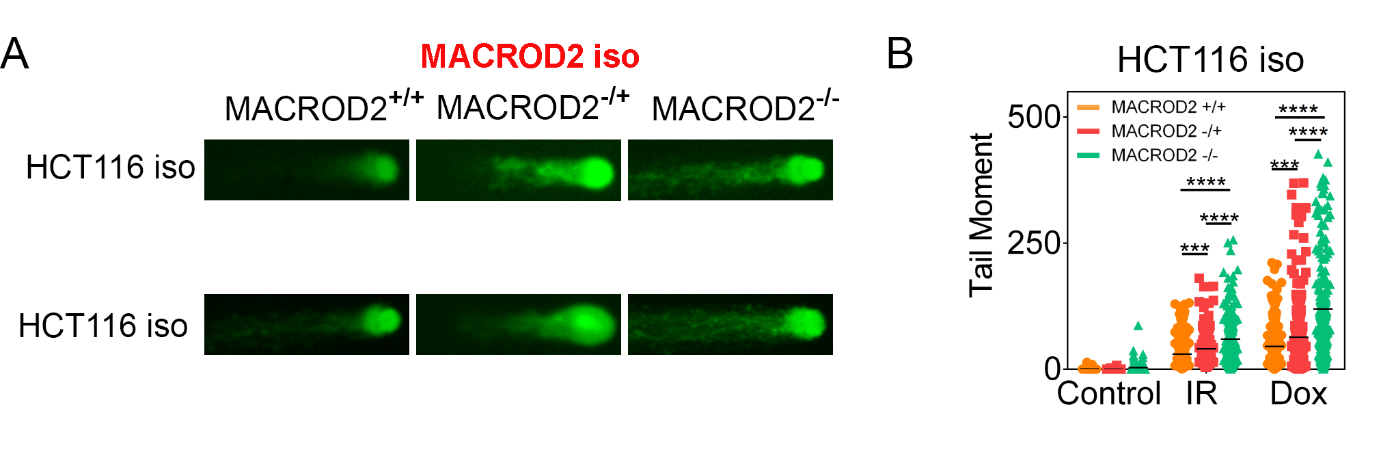
**

**Figure S10.** MACROD2 deficiency increases cell sensitivity to genotoxic stress-induced DNA damage. (**A**) Representative images of γ-irradiation (IR, 10Gy) and doxorubicin (Dox, 0.5µM) induced DNA damage in *MACROD2+/+*, *MACROD2-/+* and *MACROD2-/-* isogenic HCT116 cells, as measured by the neutral comet assay (detects DNA-DSBs). (**B**) Levels of DNA damaged quantified by the tail moment in the comet assay. All data are means ± SEM for >100 comets of a representative duplicate experiment. ****p*<0.001, *****p*<0.0001 (Student’s t test).

**
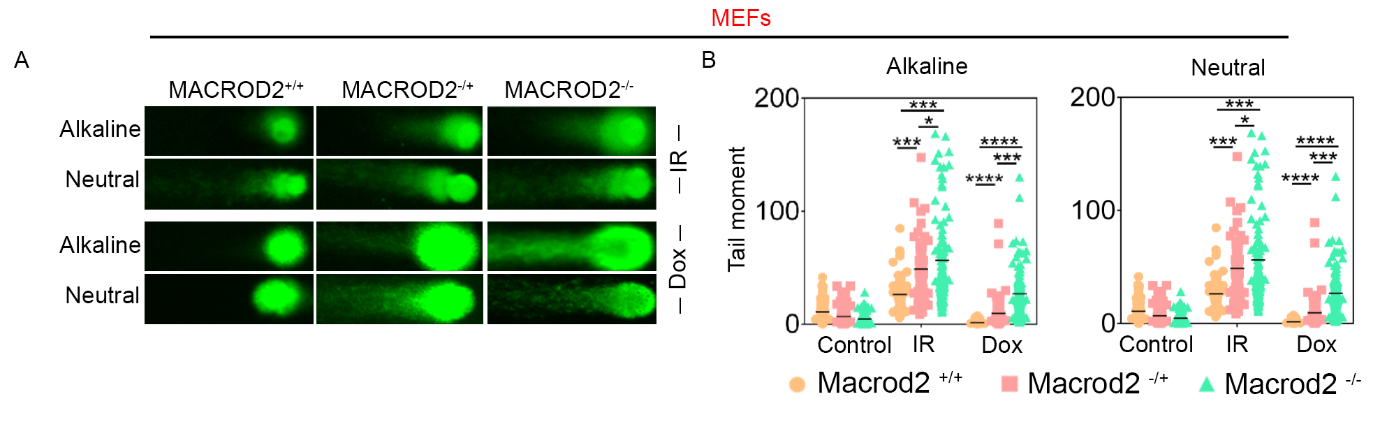
**

**Figure S11.** MACROD2 deficiency increases cell sensitivity to genotoxic stress-induced DNA damage. (**A**) Representative images of γ-irradiation (IR, 10Gy) and doxorubicin (Dox, 0.5µM) induced DNA damage in *Macrod2+/+*, *Macrod2-/+* and *Macrod2-/-* MEF cells, as measured by the alkaline comet assay (detects DNA-SSBs) and neutral comet assay (detects DNA-DSBs). (**B**) Levels of DNA damaged quantified by the tail moment in the comet assay. Data are presented as the mean ± SEM for >100 comets representative of duplicate experiments. **p*<0.05, ***p*<0.01, ****p*<0.001, *****p*<0.0001 (Student’s t-test).

**
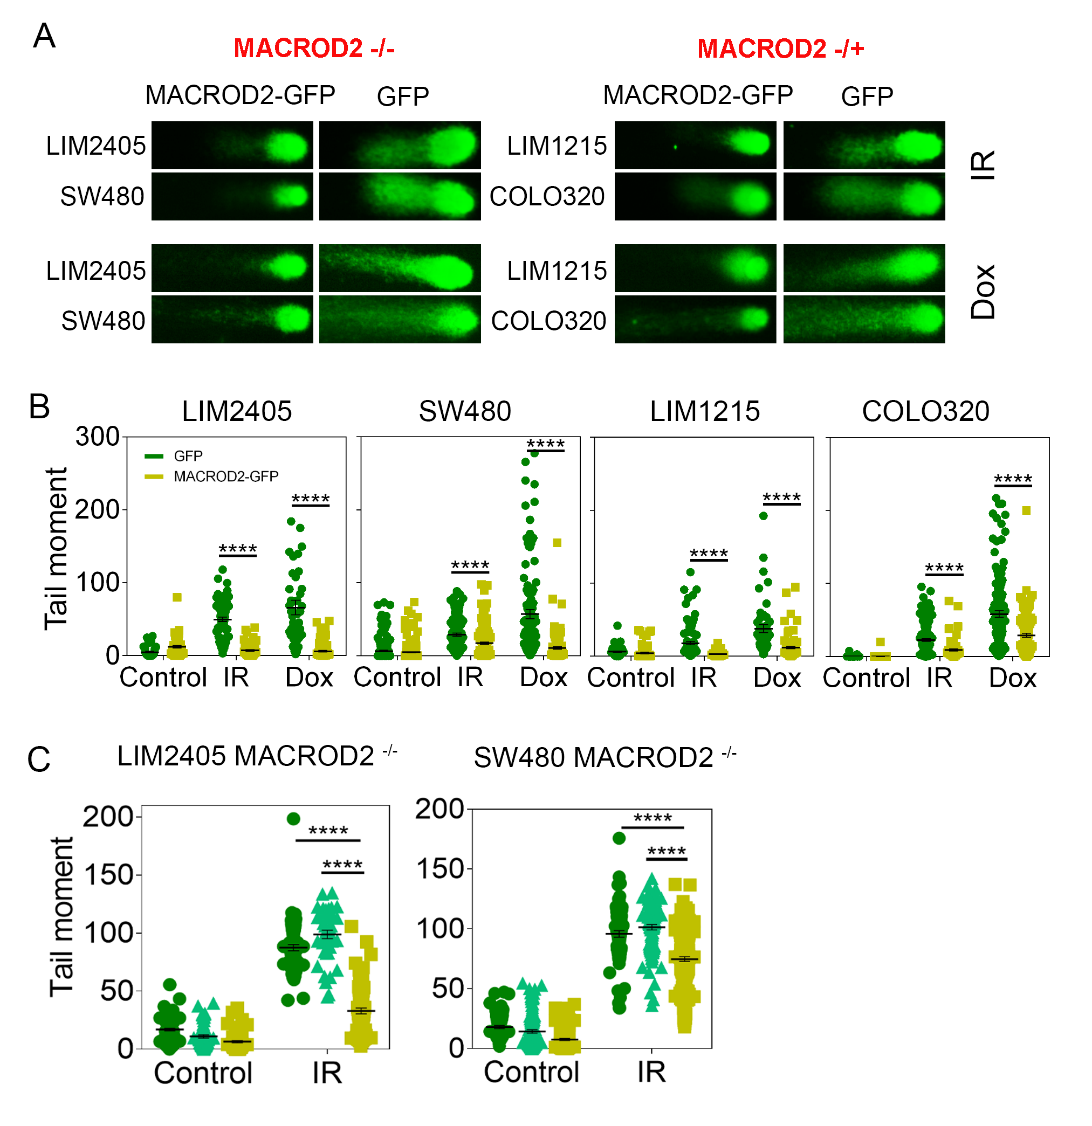
**

**Figure S12.** MACROD2 deficiency increases cell sensitivity to genotoxic stress-induced DNA damage. (**A**) Representative images of IR and Dox induced DNA damage in LIM2405-MACROD2-/-, SW480-MACROD2-/- and LIM1215-MACROD2-/+ or COLO320-MACROD2-/+ cells reconstituted with wild-type MACROD2 or GFP control, as measured by the neutral comet assay. (**B**) Levels of DNA damaged quantified by the tail moment in the comet assay. (**C**) Reconstitution of *MACROD2* deleted cell lines with MACROD2Δex4 protein lacking the macrodomain did not rescue MACROD2 loss associated DNA repair defects. Levels of γ-irradiation (IR, 10Gy) induced DNA damaged quantified by the tail moment in LIM2405-*MACROD2-/-* and SW480-*MACROD2-/-* cells reconstituted with MACROD2Δex4 protein, wild-type *MACROD2*or GFP control, as measured by the alkaline comet assay. Data are means ± SEM for >100 comets of a representative duplicate experiment. *****p*<0.0001 (Student’s t test)


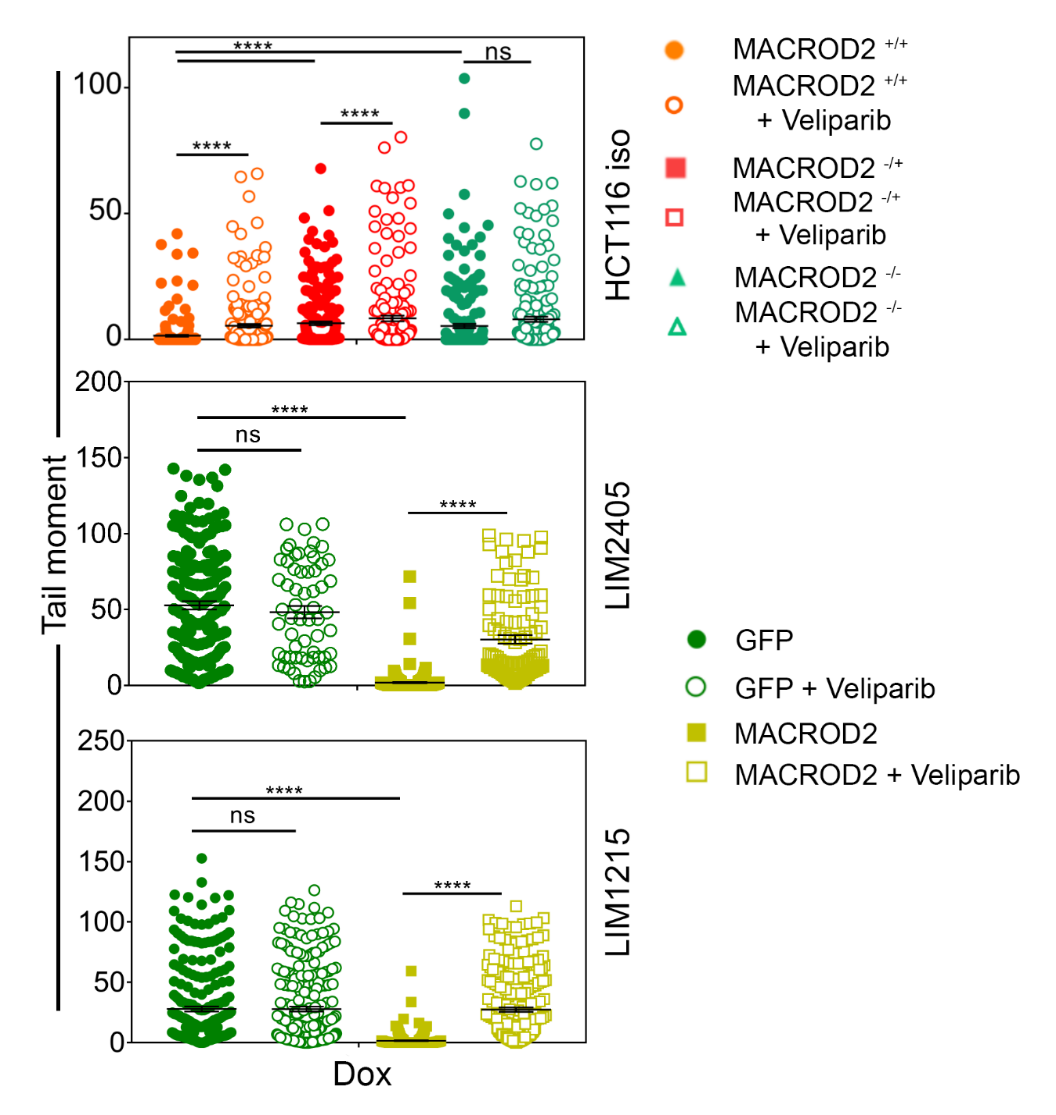


**Figure S13.** Pharmacological inhibition of PARP1 in *MACROD2+/+*, *MACROD2-/+* and *MACROD2-/-* isogenic HCT116 cells and LIM2405-*MACROD2-/-* and LIM1215-*MACROD2-/+* reconstituted with wild-type *MACROD2*or GFP control. Cells were treated with γ-irradiation (IR, 10Gy), doxorubicin (Dox, 0.5µM) and/or veliparib (1µM) as indicated. DNA damage was measure using the alkaline comet assay and quantified by the tail moment. Data are presented as the mean ± SEM for >100 comets representative of duplicate experiments. ns, not significant; *****p*<0.0001, Student’s t-test.

**
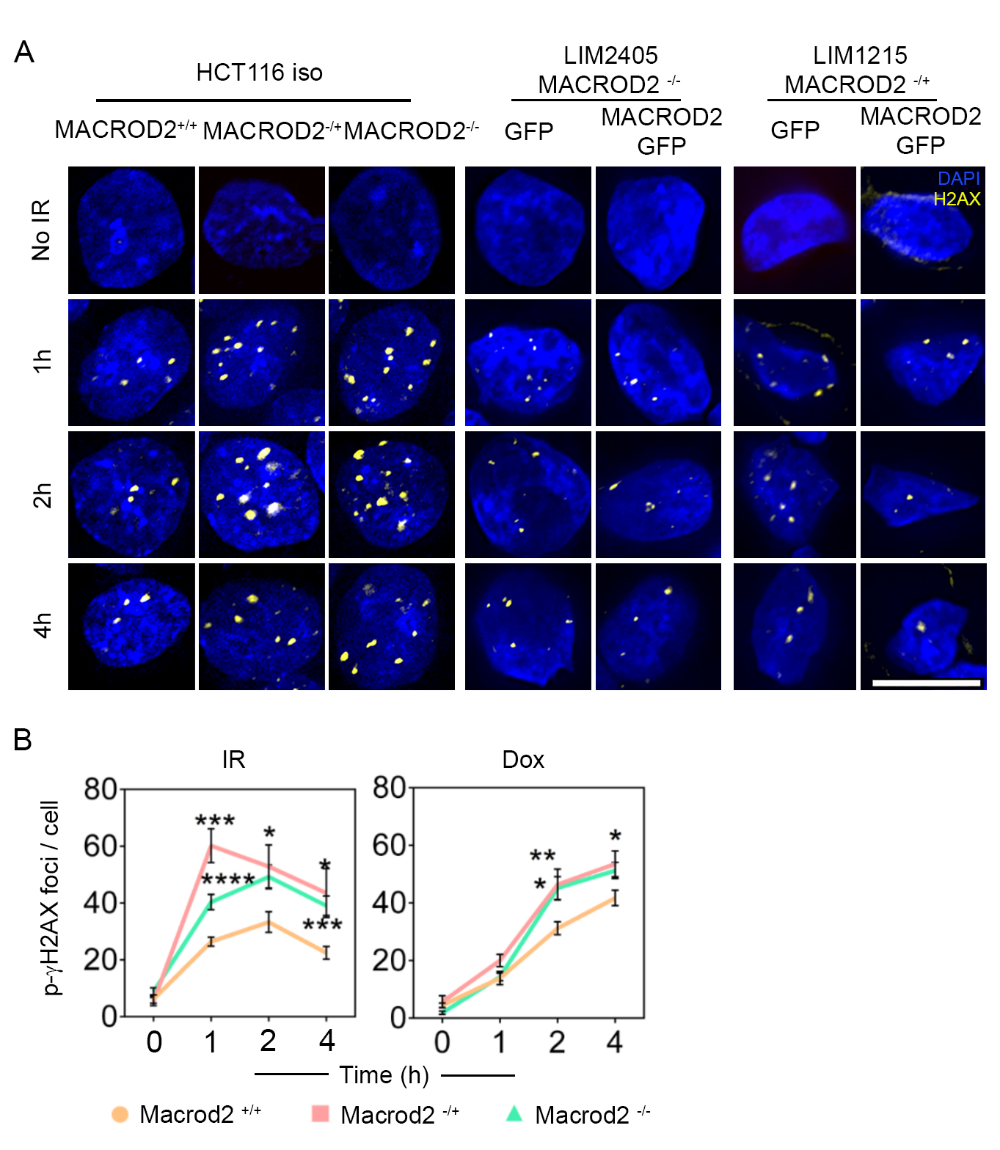
**

**Figure S14.** MACROD2 deficiency increases cell sensitivity to genotoxic stress-induced DNA damage as measured by γ-H2AX foci.(**A**)Representative images of γ-H2AX foci in isogenic HCT116-*MACROD2-/-*, HCT116-*MACROD2-/+* and HCT116-*MACROD2+/+*cells or LIM2405-*MACROD2-/-* and LIM1215-*MACROD2-/+* cells reconstituted with wild-type *MACROD2* or GFP control. Cells were subject to IR (2Gy), collected at the times indicated and immunostained with anti-γH2AX antibody (yellow) and DAPI (blue) (scale bar, 20µm). (**B**) Quantification of the number of γ-H2AX foci for IR or treatment with doxorubicin in in *Macrod2+/+*, *Macrod2-/+* and *Macrod2-/-* MEF cells (> 80 cells). Data are means ± SEM for a representative duplicate experiment. **p*<0.05, ***p*<0.01, ****p*<0.001, *****p*<0.0001 (Student’s t-test).

**
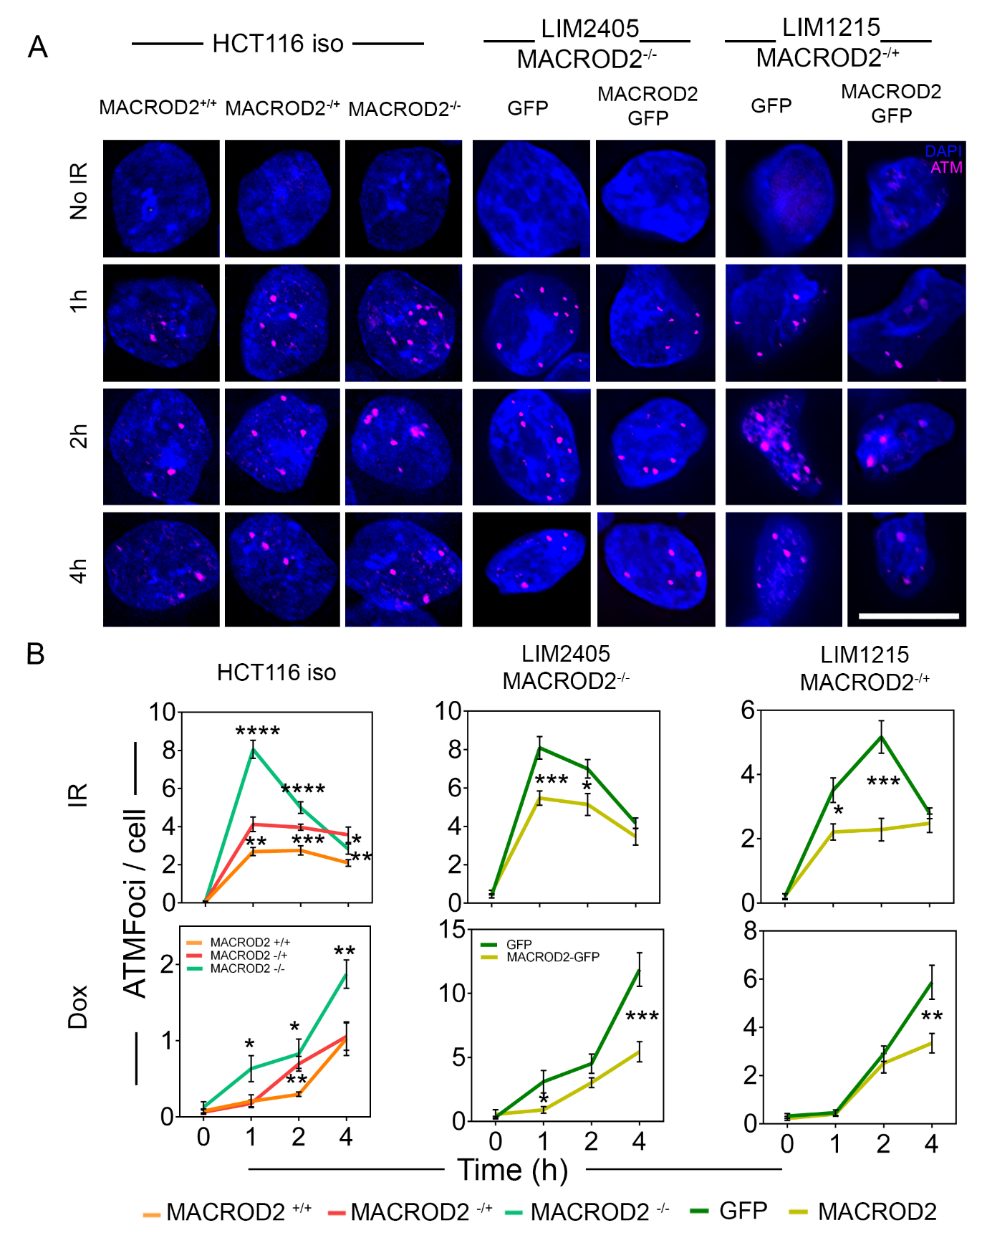
**

**Figure S15.** MACROD2 deficiency increases cell sensitivity to genotoxic stress-induced DNA damage as measured by p-ATM foci. (**A**) Representative images of p-ATM foci in isogenic HCT116-*MACROD2-/-*, HCT116-*MACROD2-/+* and HCT116-*MACROD2+/+*cells or LIM2405-*MACROD2-/-* and LIM1215-*MACROD2-/+* cells reconstituted with wild-type *MACROD2* or GFP control. Cells were subject to IR (2Gy), collected at the times indicated and immunostained with anti-pATM (red) and DAPI (blue) (scale bar, 20µm). (**B**) Quantification of the number of pATM foci for IR or treatment with doxorubicin (Dox, 0.5µM) in > 80 cells for the indicated CRC cell lines. Data are means ± SEM for a representative duplicate experiment. **p*<0.05, ***p*<0.01, ****p*<0.001, *****p*<0.0001 (Student’s t test).

**
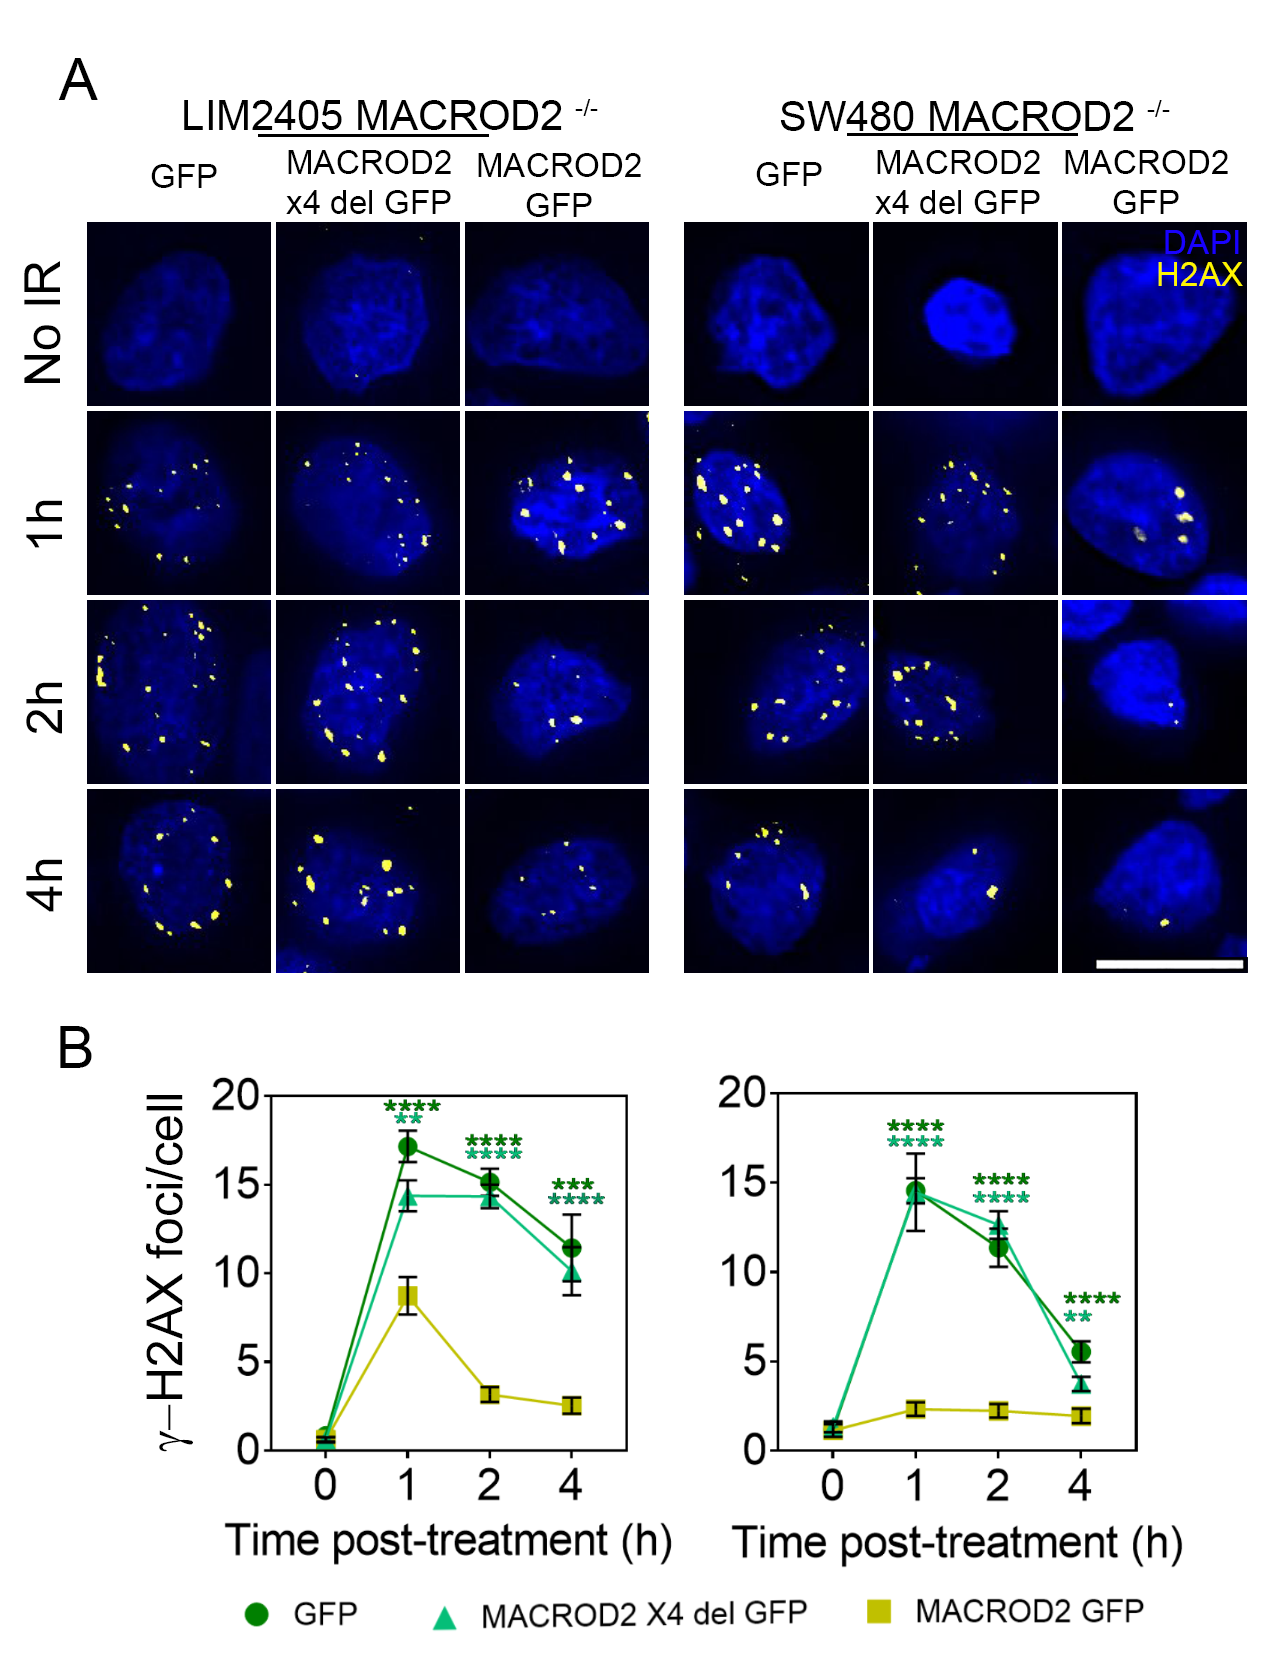
**

**Figure S16.** Reconstitution of *MACROD2* deleted cell lines with MACROD2Δex4 protein lacking the macrodomain did not rescue MACROD2 loss associated DNA repair defects as measured by γ-H2AX foci. (**A**) Representative images of γ-H2AX foci. Cells were subject to IR (2Gy), collected at the times indicated and immunostained with anti-γ-H2AX (yellow) and DAPI (blue) (scale bar, 20µm). (**B**) Quantification of the number of γ-H2AX foci for IR in > 80 cells. Data are means ± SEM for a representative duplicate experiment. ***p*<0.01, ****p*<0.001, *****p*<0.0001 (Student’s t test).

**
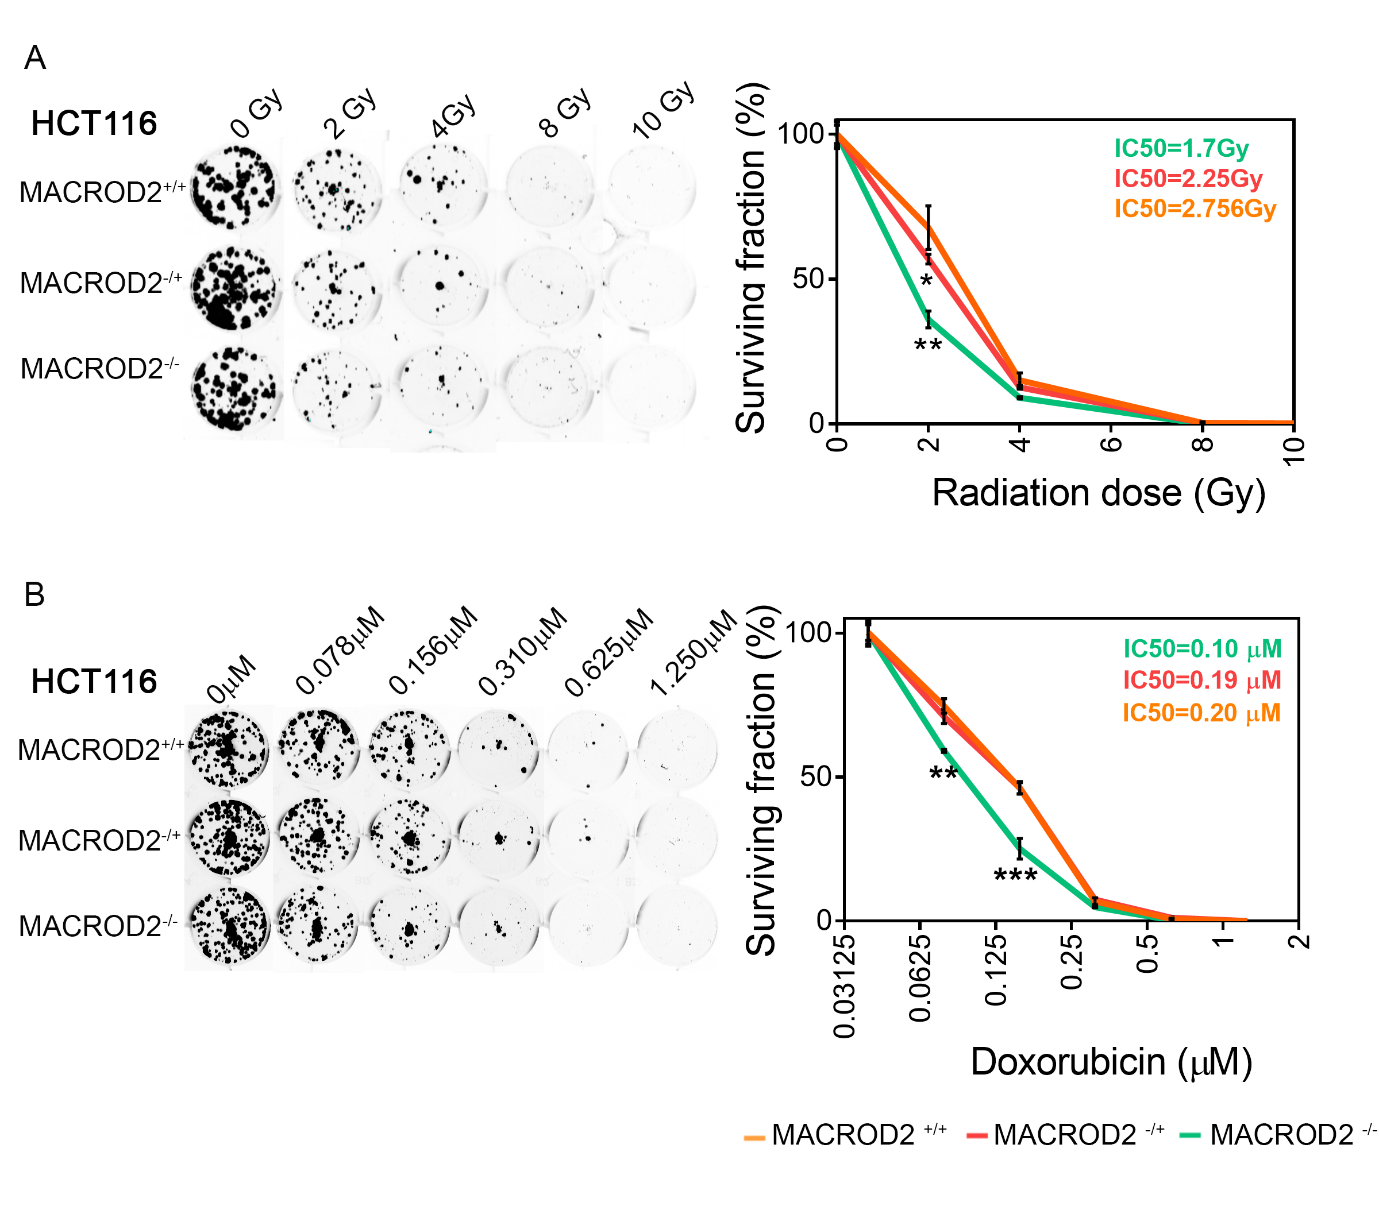
**

**Figure S17.** Clonogenic assays for isogenic HCT116-*MACROD2-/-*, HCT116-*MACROD2-/+* and HCT116-*MACROD2+/+*cells treated with γ-irradiation or doxorubicin at the indicated concentrations. Representative images of colony formation and plots of surviving fraction over concentration ranges are shown. **p*<0.05, ***p*<0.01, ****p*<0.001 (Student’s t test).

**
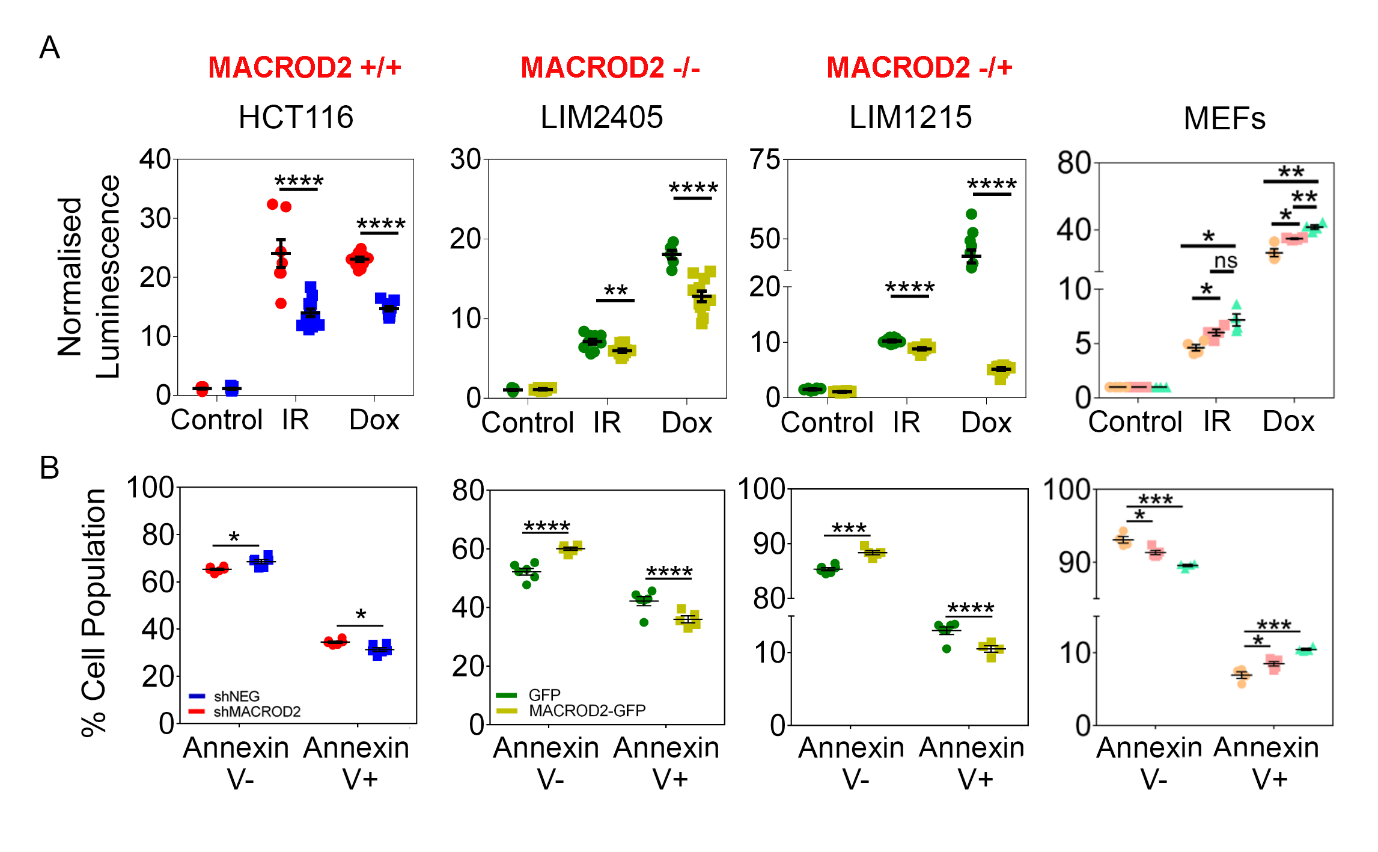
**

**Figure S18.** MACROD2 deficiency increases cell sensitivity to DNA damage induced apoptosis in HCT116-*MACROD2+/+* cells expressing MACROD2-shRNA or Control-shRNA, and in LIM2405-*MACROD2-/-* and LIM1215-*MACROD2-/+* cells reconstituted with wild-type MACROD2 or GFP control and *Macrod2* MEFs (**A**)Caspase 3/7 activity at 72 hrs post -irradiation (IR, 10Gy) or doxorubicin (Dox, 0.5µM) treatment as measured by the Caspase-Glo® 3/7 Assay and (**B**) proportion of Annexin V positive cells at 24 hrs post IR as measured by flow cytometry. Data are means ± SEM of 12 replicates of a representative duplicate experiment for Caspase assay and means ± SEM of 4 replicates of a triplicate experiment for Annexin V flow cytometry. **p*<0.05, ***p*<0.01, ****p*<0.001, *****p*<0.0001 (Student’s t test).

**
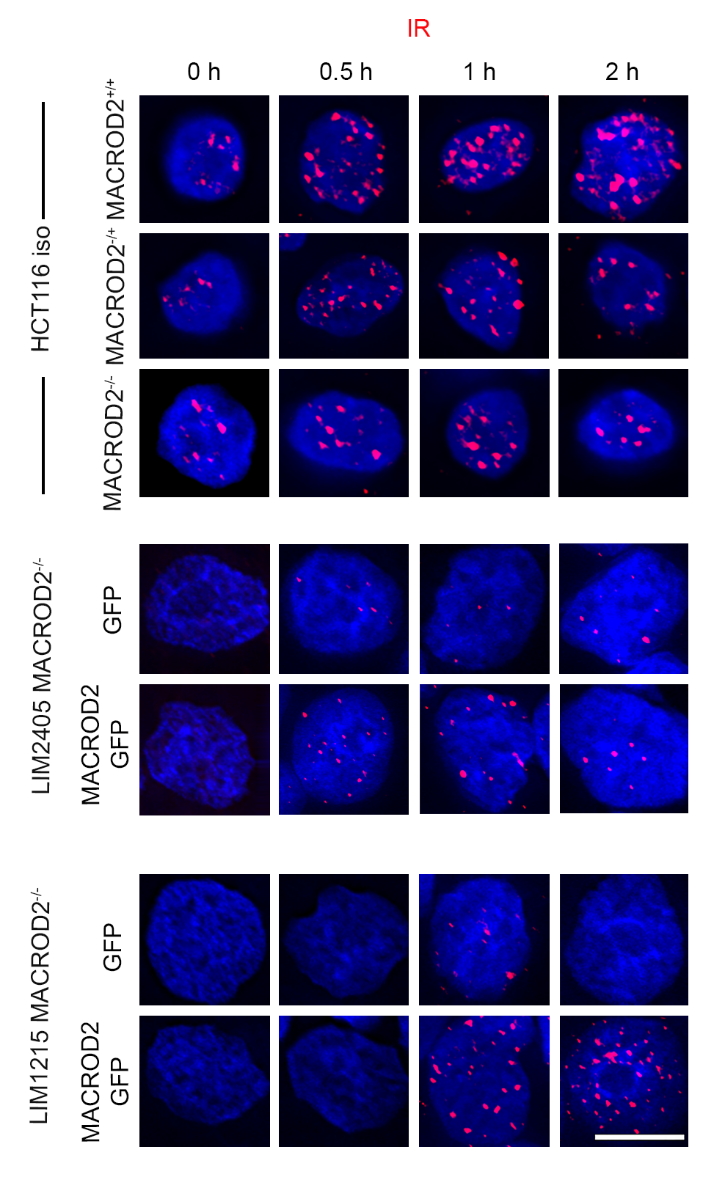
**

**Figure S19.** Representative images of BRCA1 foci in isogenic HCT116-*MACROD2-/-*, HCT116-*MACROD2-/+* and HCT116-*MACROD2+/+*cells or LIM2405-*MACROD2-/-* and LIM1215-*MACROD2-/+* cells reconstituted with wild-type *MACROD2* or GFP control. Cells were subject to IR (2Gy), collected at the times indicated and immunostained with anti-BRCA1 antibody (pink) and DAPI (blue) (scale bar, 20µm).


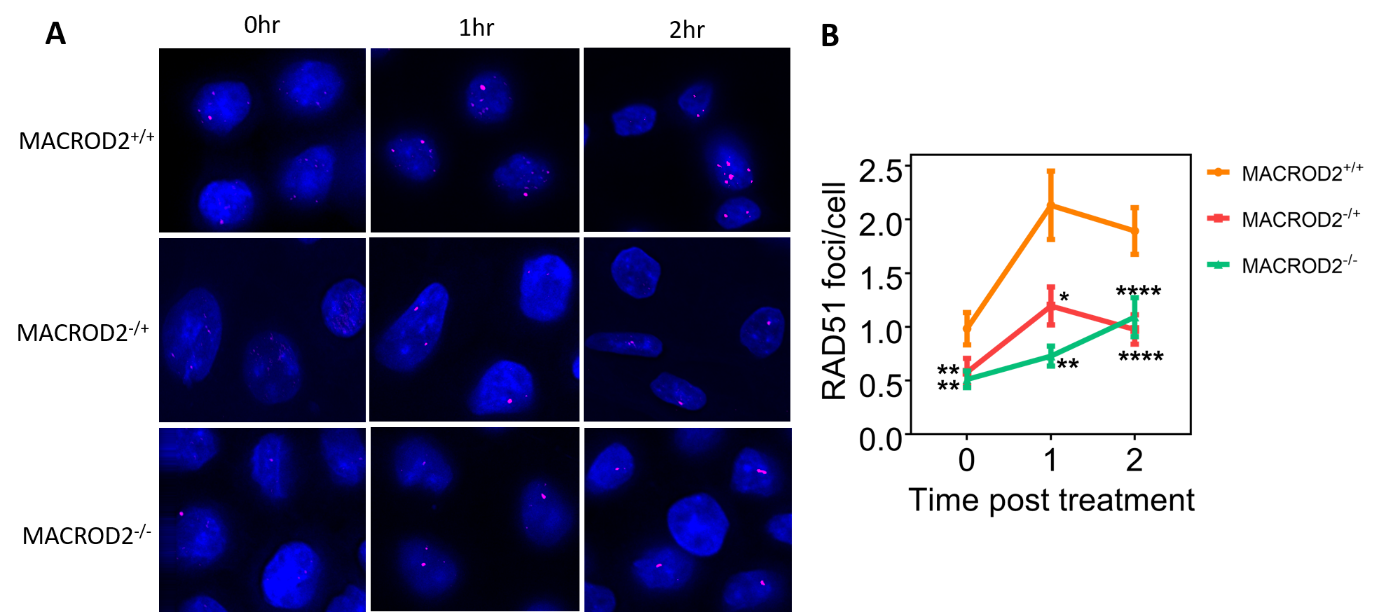


**Figure S20.** Representative images (A) and quantification (B) of RAD51 foci in isogenic HCT116-*MACROD2-/-*, HCT116-*MACROD2-/+* and HCT116-*MACROD2+/+* cells. Cells were subject to IR (2Gy), collected at the times indicated and immunostained with anti-RAD51 antibody (pink) and DAPI (blue) (scale bar, 20µm). Quantification of the number of RAD51 foci is for >80 cells; data are means ± SEM. *p<0.05, **p<0.01, ***p<0.001, ****p<0.0001 (Student’s t test).


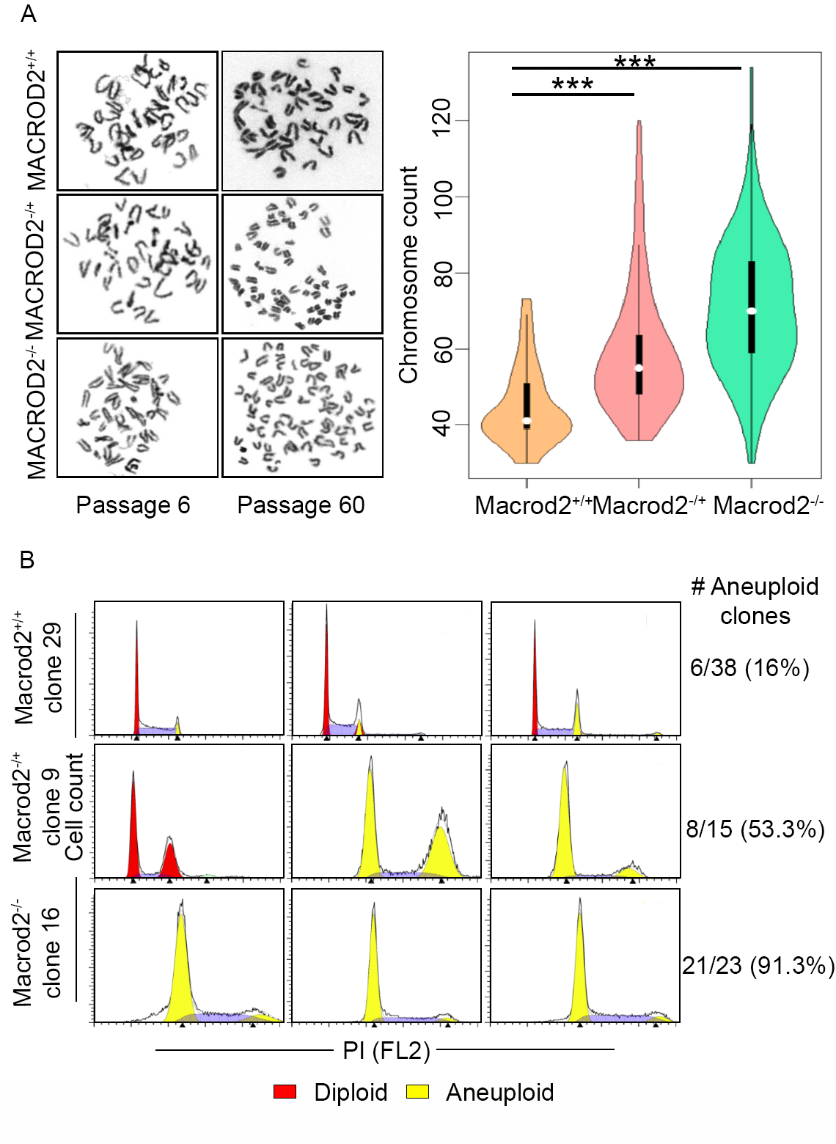


**Figure S21.** MACROD2 deficiency promotes chromosome instability. (**A**) Metaphase analyses for *Macrod2-/-*, *Macrod2-/+* and *Macrod2+/+* MEF cells showing representative spreads at passage 6 and 60 and violin plots summarizing chromosome counts (>50 metaphases per genotype). ****p*<0.001 (Levene's test). (**B**) Flow cytometry analysis for DNA content (Red = diploid, Yellow = aneuploid) of single cell clones from *Macrod2-/-*, *Macrod2-/+* and *Macrod2+/+* MEF cells at passage 60. Representative plots shown.

**
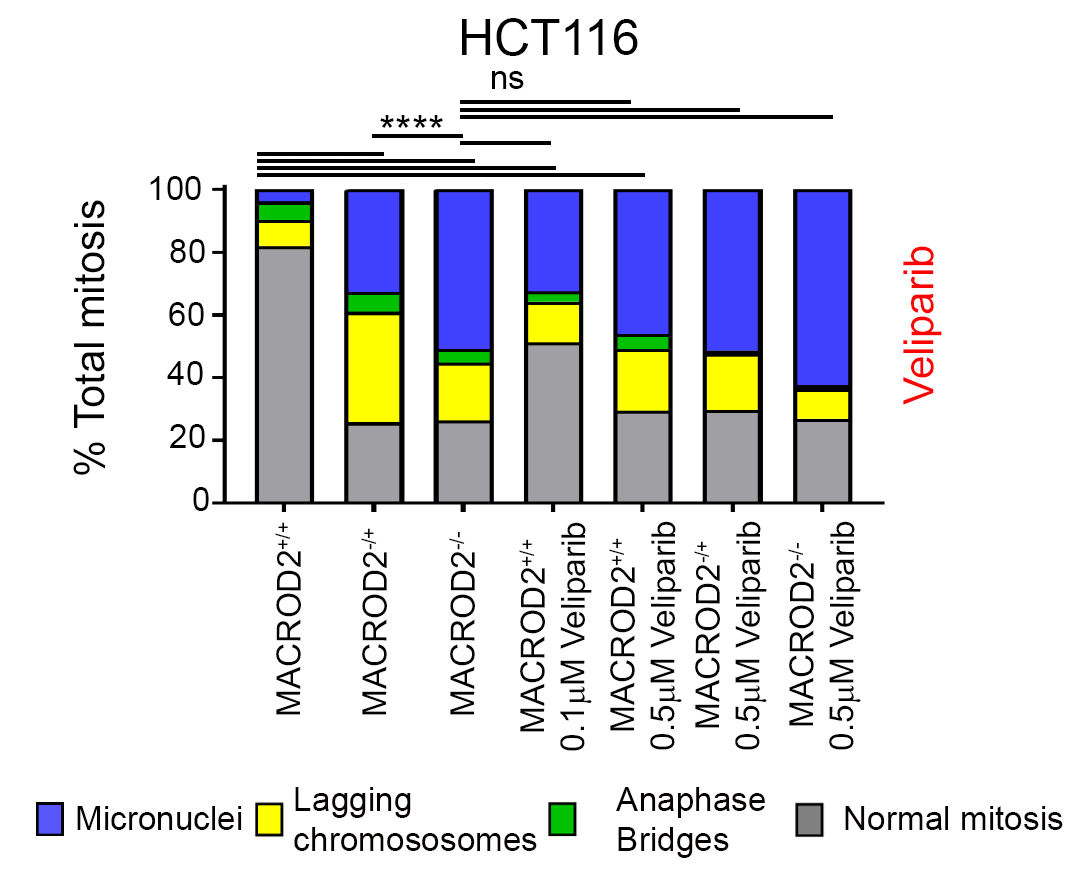
**

**Figure S22.** MACROD2 deficiency promotes chromosome instability. Quantification of segregation errors for isogenic HCT116-*MACROD2-/-*, HCT116-*MACROD2-/+* and HCT116-*MACROD2+/+* cells with/without veliparib treatment at the indicated concentrations. HCT116 cells were stained with DAPI, CENP-A and -tubulin. Data is representative of triplicate experiments with 150 mitotic events scored. ns, not significant; ****p<0.0001 (Student’s t test).

**
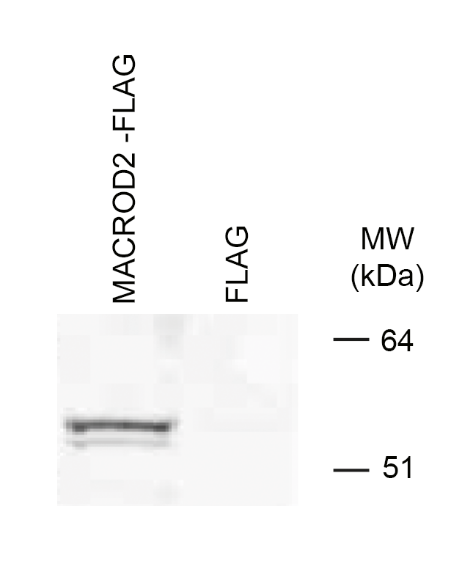
**

**Figure S23.** Validation of specificity of immunopurified anti-MACROD2 antibody by western blot using HeLa cells transfected with FLAG-MACROD2 fusion protein.
